# Supplementary material for: CD200R1L is a functional evolutionary conserved activating receptor in human neutrophils
Source: PubMed Central journal article supplement — J Leukoc Biol. 2021 Apr 22;111(2):367–77. doi: 10.1002/JLB.2A0520-334R (PMC9291319; doi:10.1002/jlb.2a0520-334r), 2021-04-22

## Supplementary Methods

### Flow cytometric analysis

Table 1: Antibodies used for flow cytometric analysis

| <b>Antibodies</b>            | <b>clone</b> | <b>isotype</b> | <b>company</b>     | <b>Cat number</b> |
|------------------------------|--------------|----------------|--------------------|-------------------|
| Anti-CD200R1L-biotin         | 6D6C1        | Mouse IgG1     | Sino Biological    | 11620-MM09-B      |
| Unlabelled Anti-CD200R1L     | 6D6C1        | Mouse IgG1     | Sino Biological    | 11620-MM09        |
| Anti-CD200-FITC              | OX-104       | IgG1           | Serotec            | MCA1960F          |
| Anti-CD200R-PE               | OX108        | Mouse IgG1     | eBioscience        | 12-9201-42        |
| Anti-CD16-BV785              | 3G8          | Mouse IgG1     | Sony Biotechnology | 2110230           |
| Anti-CD14-ECD                | RMO52        | Mouse IgG2a    | Beckman Coulter    | IM2707U           |
| Anti-CD11b-AF700             | ICRF44       | Mouse IgG1     | BD                 | 557918            |
| Anti-CD62L-BV650             | DREG-56      | Mouse IgG1     | AntibodyChain      | 2124160           |
| Anti-CD203c- PE-Cy7          | NP4D6        | Mouse IgG1     | eBioscience        | 25-2039-41        |
| Anti-CD117- PerCP-Cy5.5      | 104D2        | Mouse IgG1     | Biolegend          | 313214            |
| Anti-Myc -AF700              | 9E10         | Mouse IgG1     | R&D                | IC3696N           |
| IgG1 isotype control- biotin | MOPC-31C     | Mouse IgG1     | BD                 | 550615            |
| IgG isotype control- FITC    | P3.6.2.8.1   | Mouse IgG1     | eBioscience        | 11-4714-82        |
| IgG isotype control- PE      | P3.6.2.8.1   | Mouse IgG1     | eBioscience        | 12-4714-82        |
| Streptavidin-AF647           |              |                | Invitrogen         | S32357            |
| Anti-mouse IgG (H+L)-APC     |              | F(ab)'2        | Southern Biotech   | 1032-11           |

**Supplementary Table 1**

| Reference sequences IDs |                                               |
|-------------------------|-----------------------------------------------|
| 109033055               | CD200R_inhibitory_1_Macaca_mulatta            |
| 10946634                | CD200R_inhibitory_1_Mus_musculus              |
| 114588494               | CD200R_activating_1_Pan_troglodytes           |
| 114588498               | CD200R_inhibitory_1_Pan_troglodytes           |
| 13027398                | CD200R_inhibitory_1_Rattus_norvegicus         |
| 150247136               | CD200R_inhibitory_1_Bos_taurus                |
| 20270365                | CD200R_inhibitory_1_Homo_sapiens              |
| 224044068               | CD200R_inhibitory_1-Taeniopygia_guttata       |
| 28892873                | CD200R_activating_5_Mus_musculus              |
| 297284992               | CD200R_activating_1_Macaca_mulatta            |
| 312837071               | CD200R_activating_1_Homo_sapiens              |
| 332225393               | CD200R_inhibitory_1_Nomascus_leucogenys       |
| 343780915               | CD200R_inhibitory_1_Sus_scrofa                |
| 344282295               | CD200R_inhibitory_1_Loxodonta_africana        |
| 344282297               | CD200R_activating_1_Loxodonta_africana        |
| 346986386               | CD200R_activating_2_Sus_scrofa                |
| 354471385               | CD200R_activating_5_Cricetulus_griseus        |
| 354471387               | CD200R_activating_2_Cricetulus_griseus        |
| 354471389               | CD200R_inhibitory_1_Cricetulus_griseus        |
| 395850391               | CD200R_activating_2_Otolemur_garnettii        |
| 395850393               | CD200R_activating_1_Otolemur_garnettii        |
| 395850395               | CD200R_inhibitory_1_Otolemur_garnettii        |
| 397509471               | CD200R_activating_1_Pan_paniscus              |
| 397509475               | CD200R_inhibitory_1_Pan_paniscus              |
| 402859025               | CD200R_inhibitory_1_Papio_anubis              |
| 426341578               | CD200R_activating_1_Gorilla_gorilla_gorilla   |
| 426341581               | CD200R_inhibitory_1_Gorilla_gorilla_gorilla   |
| 441664851               | CD200R_activating_1_Nomascus_leucogenys       |
| 449485852               | CD200R_activating_1-Taeniopygia_guttata       |
| 45433592                | CD200R_activating_3_Mus_musculus              |
| 45504373                | CD200R_activating_2_Mus_musculus              |
| 46402237                | CD200R_activating_4_Mus_musculus              |
| 478524966               | CD200R_inhibitory_1_Ceratotherium_simum_simum |
| 478524968               | CD200R_activating_1_Ceratotherium_simum_simum |
| 504131134               | CD200R_inhibitory_1_Ochotona_princeps         |
| 504131137               | CD200R_activating_1_Ochotona_princeps         |
| 507619527               | CD200R_activating_1_Octodon_degus             |
| 507653622               | CD200R_inhibitory_1_Octodon_degus             |
| 507662242               | CD200R_activating_1_Echinops_telfairi         |
| 507662250               | CD200R_inhibitory_1_Echinops_telfairi         |
| 507668976               | CD200R_inhibitory_2_Octodon_degus             |
| 512924873               | CD200R_inhibitory_1_Heterocephalus_glaber     |
| 512946795               | CD200R_activating_1_Heterocephalus_glaber     |
| 514459914               | CD200R_activating_1_Cavia_porcellus           |
| 514459918               | CD200R_inhibitory_1_Cavia_porcellus           |
| 514738044               | CD200R_activating_1_Anas_platyrhynchos        |
| 514794915               | CD200R_inhibitory_1_Anas_platyrhynchos        |

|           |                                                    |
|-----------|----------------------------------------------------|
| 524981196 | CD200R_inhibitory_1_Ficedula_albicollis            |
| 524981198 | CD200R_activating_1_Ficedula_albicollis            |
| 524981736 | CD200R_inhibitory_2_Ficedula_albicollis            |
| 528899534 | CD200R_activating_1_Bos_taurus                     |
| 528936439 | CD200R_activating_2_Bos_taurus                     |
| 529429329 | CD200R_inhibitory_1_Falco_peregrinus               |
| 529432671 | CD200R_activating_1_Falco_peregrinus               |
| 532083990 | CD200R_activating_1_Ictidomys_tridecemlineatus     |
| 532083994 | CD200R_inhibitory_1_Ictidomys_tridecemlineatus     |
| 541989276 | CD200R_inhibitory_1_Falco_cherrug                  |
| 542154814 | CD200R_inhibitory_1_Zonotrichia_albicollis         |
| 542164891 | CD200R_activating_1_Zonotrichia_albicollis         |
| 543259283 | CD200R_inhibitory_1_Geospiza_fortis                |
| 543259286 | CD200R_activating_1_Geospiza_fortis                |
| 543264214 | CD200R_activating_2_Geospiza_fortis                |
| 543360831 | CD200R_inhibitory_1_Pseudopodoces_humilis          |
| 543361605 | CD200R_activating_1_Pseudopodoces_humilis          |
| 543741296 | CD200R_inhibitory_1_Columba_livia                  |
| 543741428 | CD200R_activating_1_Columba_livia                  |
| 544416635 | CD200R_inhibitory_1_Macaca_fascicularis            |
| 544416639 | CD200R_activating_1_Macaca_fascicularis            |
| 545192588 | CD200R_inhibitory_1_Equus_caballus                 |
| 545192590 | CD200R_activating_1_Equus_caballus                 |
| 545866123 | CD200R_activating_1_Sus_scrofa                     |
| 548449652 | CD200R_inhibitory_1_Capra_hircus                   |
| 548449759 | CD200R_activating_1_Capra_hircus                   |
| 554557970 | CD200R_inhibitory_1_Myotis_brandtii                |
| 554557972 | CD200R_activating_1_Myotis_brandtii                |
| 555983041 | CD200R_inhibitory_1_Bos_mutus                      |
| 555983057 | CD200R_activating_1_Bos_mutus                      |
| 557267142 | CD200R_activating_1_Alligator_sinensis             |
| 557269822 | CD200R_inhibitory_1_Alligator_sinensis             |
| 557269824 | CD200R_activating_2_Alligator_sinensis             |
| 558112448 | CD200R_inhibitory_1_Pelodiscus_sinensis            |
| 558168107 | CD200R_activating_1_Pelodiscus_sinensis            |
| 564314418 | CD200R_activating_1_Rattus_norvegicus              |
| 586467313 | CD200R_inhibitory_1_Chrysochloris_asiatica         |
| 586467317 | CD200R_activating_1_Chrysochloris_asiatica         |
| 589925967 | CD200R_inhibitory_1_Peromyscus_maniculatus_bairdii |
| 589926021 | CD200R_activating_1_Peromyscus_maniculatus_bairdii |
| 589926023 | CD200R_activating_2_Peromyscus_maniculatus_bairdii |
| 594102006 | CD200R_activating_1_Bubalus_bubalis                |
| 594102008 | CD200R_inhibitory_1_Bubalus_bubalis                |
| 612017591 | CD200R_activating_1_Monodelphis_domestica          |
| 612017595 | CD200R_inhibitory_1_Monodelphis_domestica          |
| 617499742 | CD200R_activating_1_Poecilia_formosa               |
| 617499745 | CD200R_inhibitory_1_Poecilia_formosa               |
| 617564030 | CD200R_activating_1_Erinaceus_europaeus            |
| 625256355 | CD200R_inhibitory_2_Cricetulus_griseus             |
| 625256357 | CD200R_activating_3_Cricetulus_griseus             |

|           |                                            |
|-----------|--------------------------------------------|
| 625256359 | CD200R_activating_4_Cricetulus_griseus     |
| 635121848 | CD200R_inhibitory_1_Chlorocebus_sabaeus    |
| 635121860 | CD200R_activating_1_Chlorocebus_sabaeus    |
| 640824441 | CD200R_activating_1_Tarsius_syrichta       |
| 640824443 | CD200R_inhibitory_1_Tarsius_syrichta       |
| 640824445 | CD200R_inhibitory_2_Tarsius_syrichta       |
| 640824447 | CD200R_inhibitory_3_Tarsius_syrichta       |
| 641750607 | CD200R_activating_1_Chrysemys_picta_bellii |
| 655854913 | CD200R_activating_1_Oryctolagus_cuniculus  |
| 655854916 | CD200R_inhibitory_1_Oryctolagus_cuniculus  |
| 663244045 | CD200R_activating_1_Calypte_anna           |
| 663288446 | CD200R_inhibitory_1_Calypte_anna           |
| 664751846 | CD200R_inhibitory_1_Equus_przewalskii      |
| 664751850 | CD200R_activating_1_Equus_przewalskii      |
| 669275215 | CD200R_activating_1_Corvus_brachyrhynchos  |
| 669275833 | CD200R_inhibitory_1_Corvus_brachyrhynchos  |
| 671028101 | CD200R_inhibitory_1_Ursus_maritimus        |
| 671028103 | CD200R_activating_1_Ursus_maritimus        |
| 672071195 | CD200R_inhibitory_2_Rattus_norvegicus      |
| 674075780 | CD200R_inhibitory_1_Nannospalax_galili     |
| 674075782 | CD200R_activating_1_Nannospalax_galili     |
| 675415240 | CD200R_inhibitory_1_Manacus_vitellinus     |
| 675420272 | CD200R_activating_1_Manacus_vitellinus     |
| 675731957 | CD200R_inhibitory_1_Callithrix_jacchus     |
| 675732268 | CD200R_activating_1_Callithrix_jacchus     |
| 685522873 | CD200R_activating_1_Papio_anubis           |
| 686587297 | CD200R_inhibitory_1_Aptenodytes_forsteri   |
| 686593650 | CD200R_activating_1_Aptenodytes_forsteri   |
| 528467467 | CD200_Danio_rerio                          |
| 26006825  | CD200_Mus_Musculus                         |
|           |                                            |

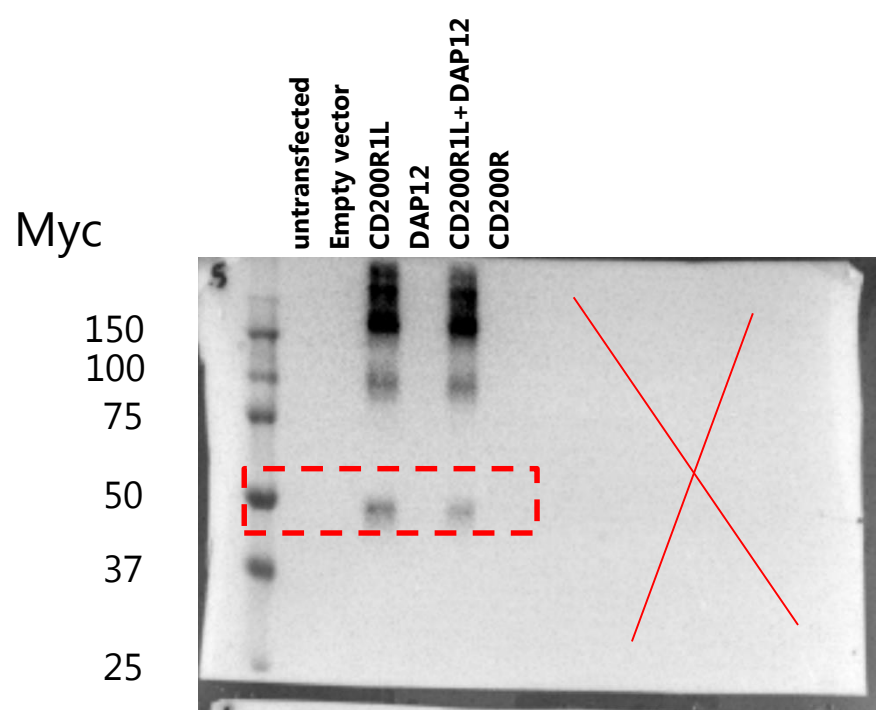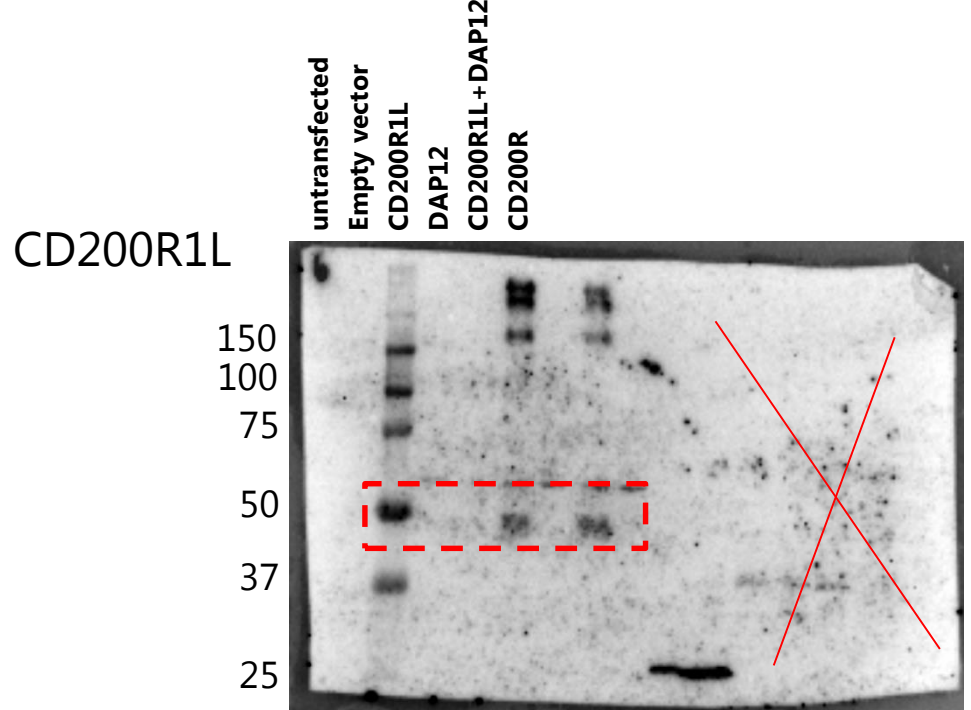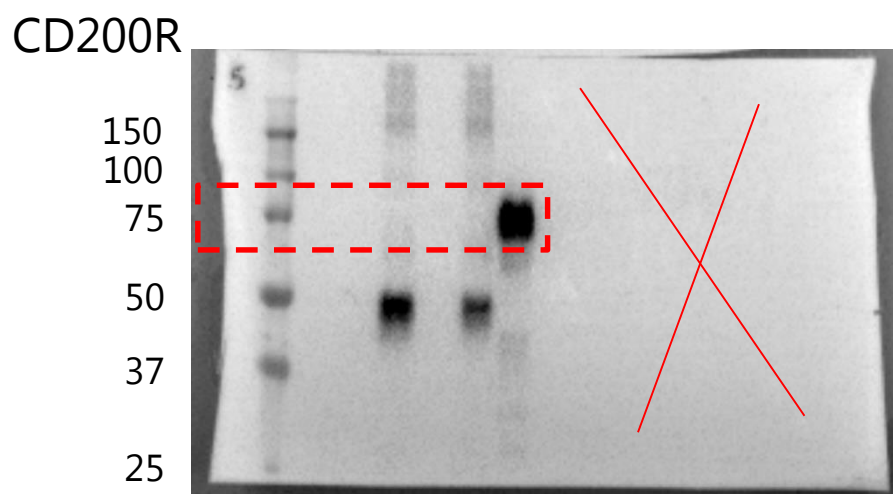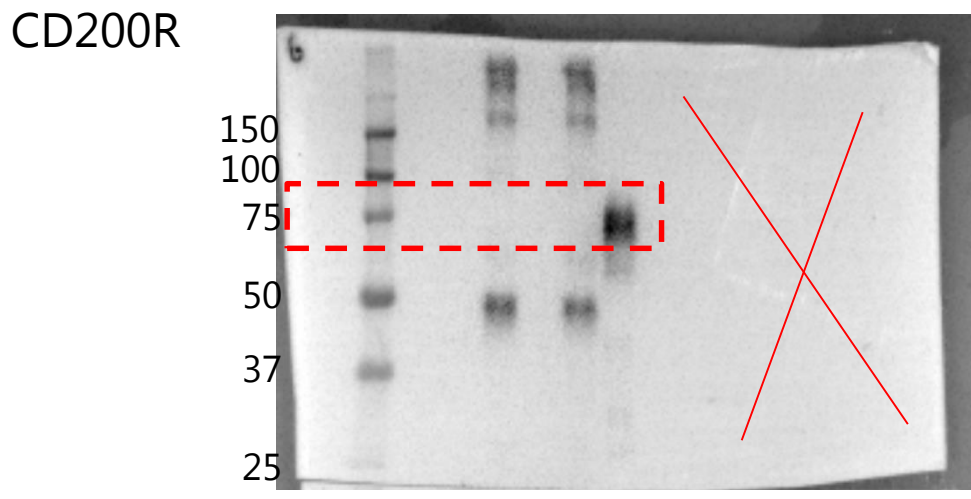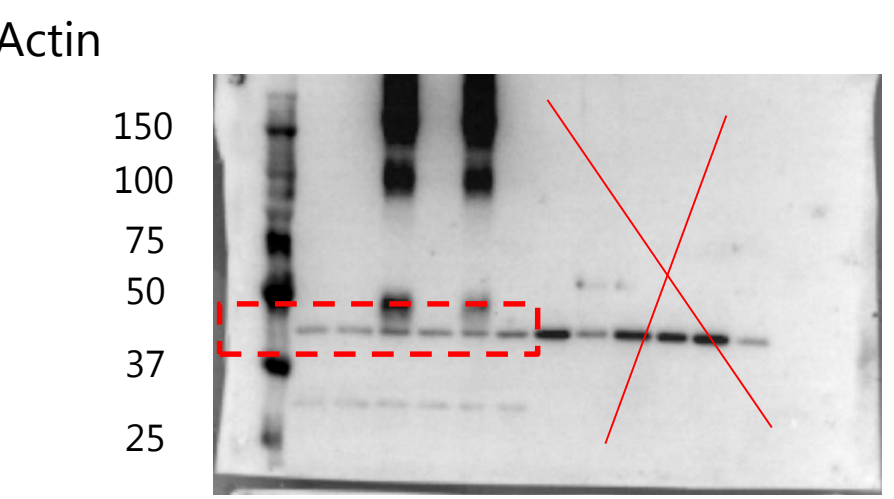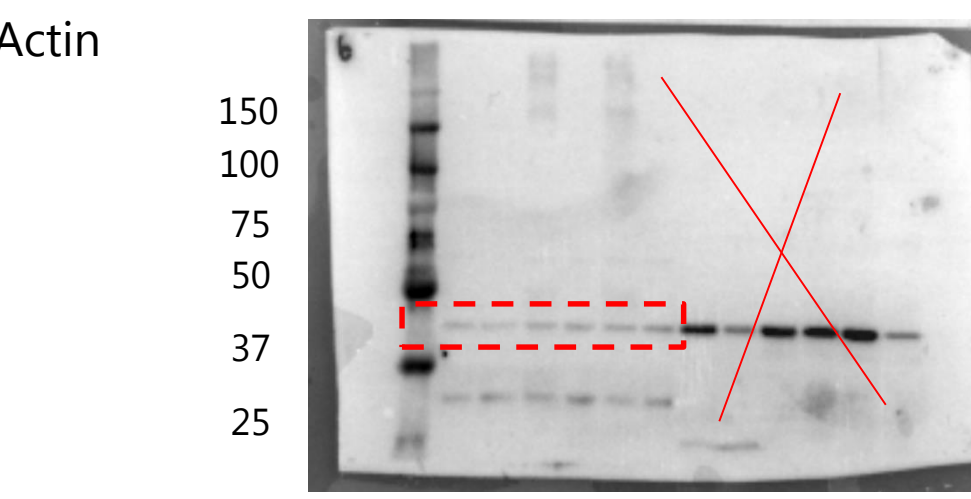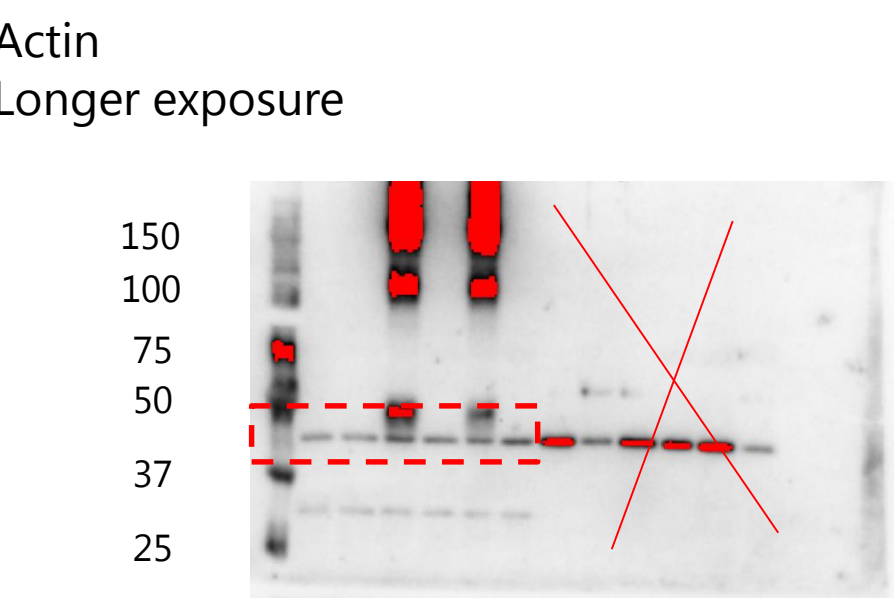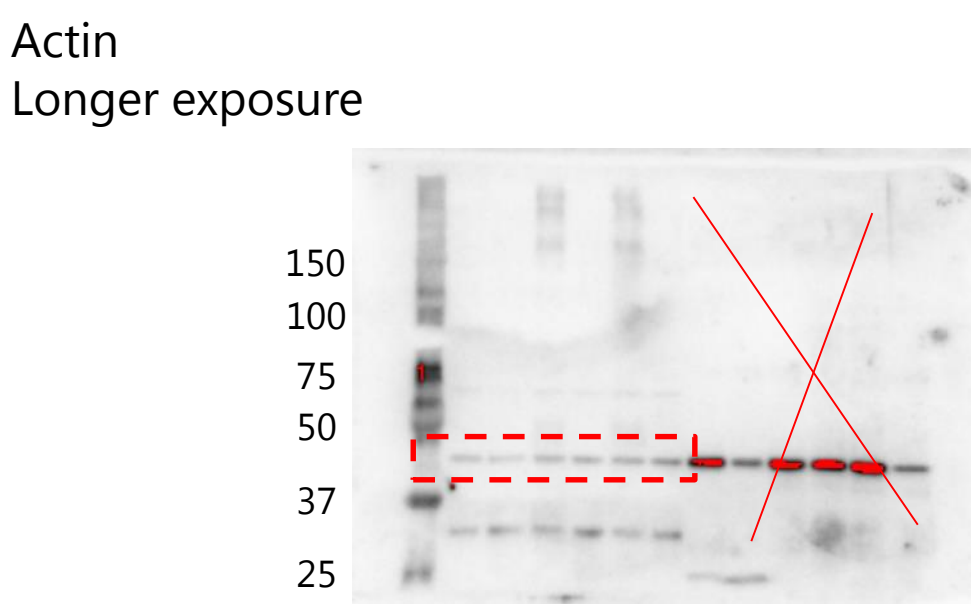

Full size blot of figure 1F (CD200R1L)

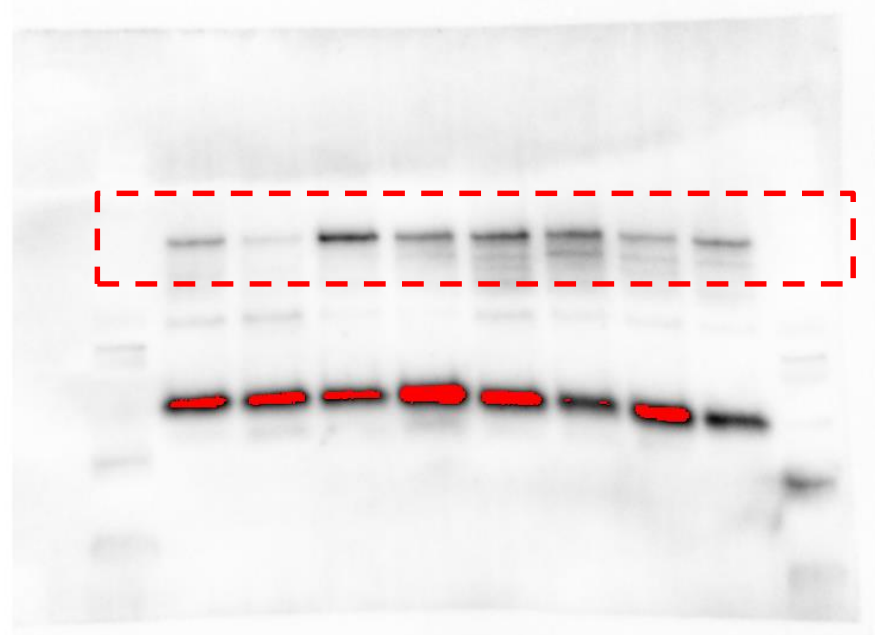

Full size blot of figure 1F (Actin – cut at ~25kD)

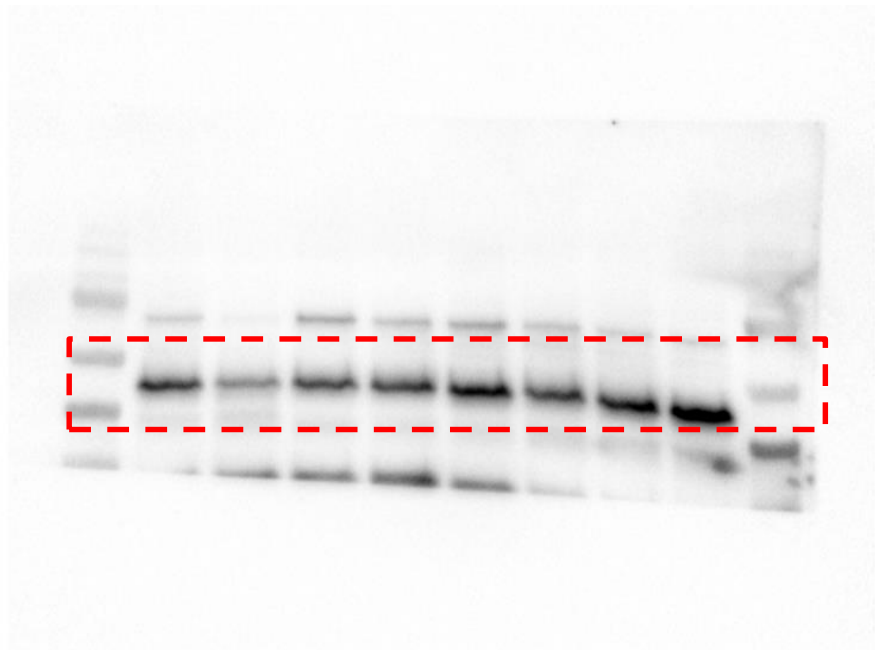

Full blot of Supplementary figure 2B (CD200R1L )

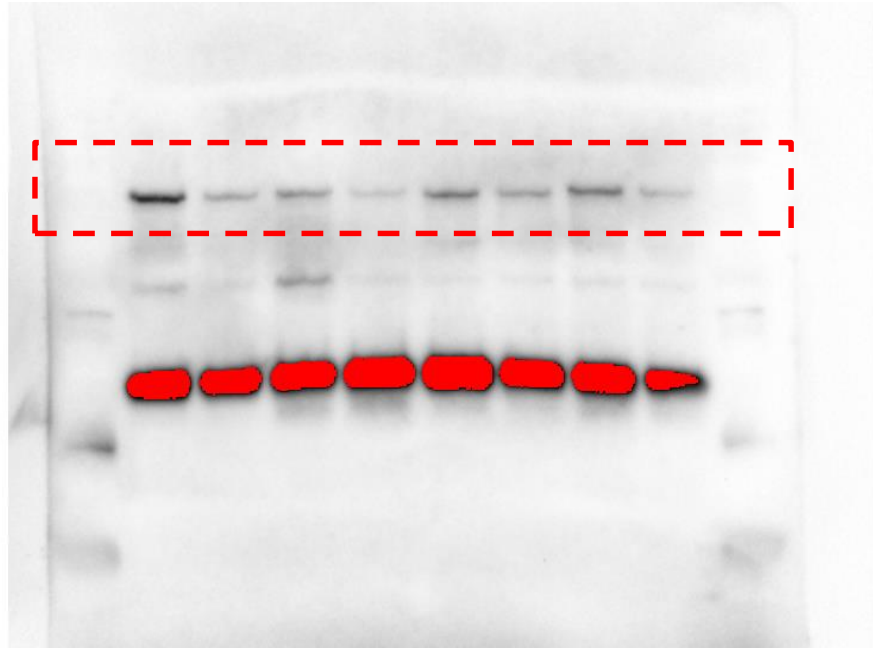

Full blot of Supplementary figure 2B (Actin – Cut at ~25kD)

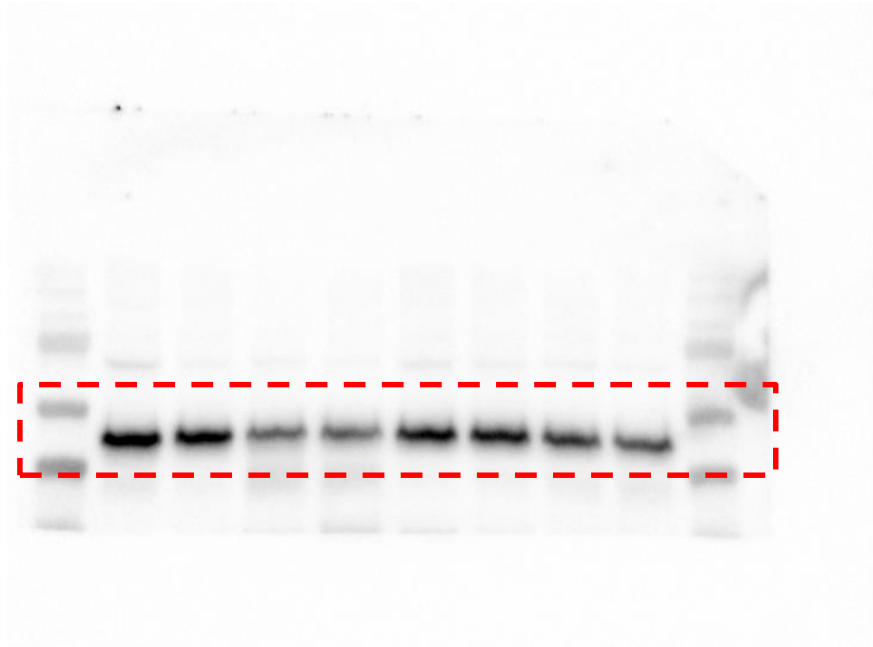

Supplement: JLB-111-367-s003.pdf [file JLB-111-367-s003.pdf]
