# Supplementary figures and images for: CD200R1L is a functional evolutionary conserved activating receptor in human neutrophils
Source: PubMed Central journal article supplement — J Leukoc Biol. 2021 Apr 22;111(2):367–77. doi: 10.1002/JLB.2A0520-334R (PMC9291319; doi:10.1002/jlb.2a0520-334r), 2021-04-22

# Supplementary Figure S2

A

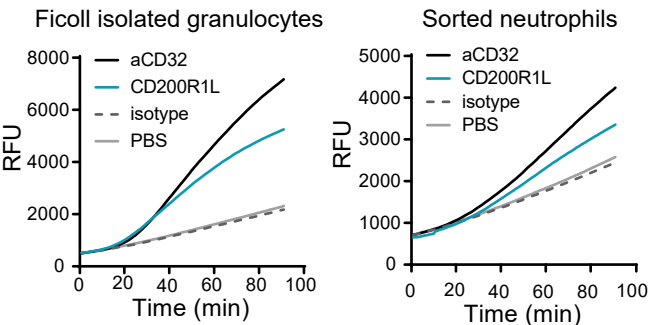

B

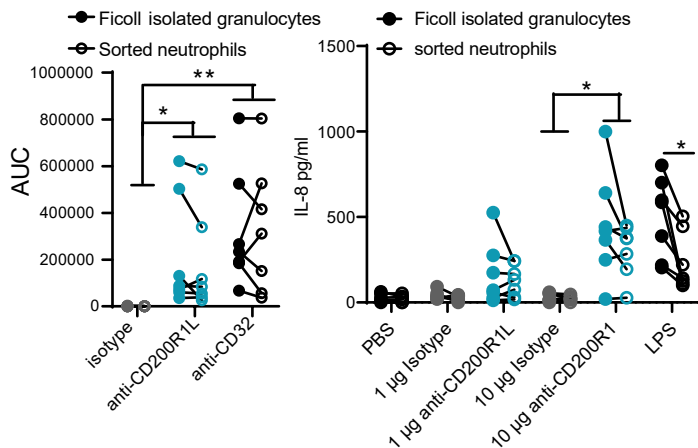

C

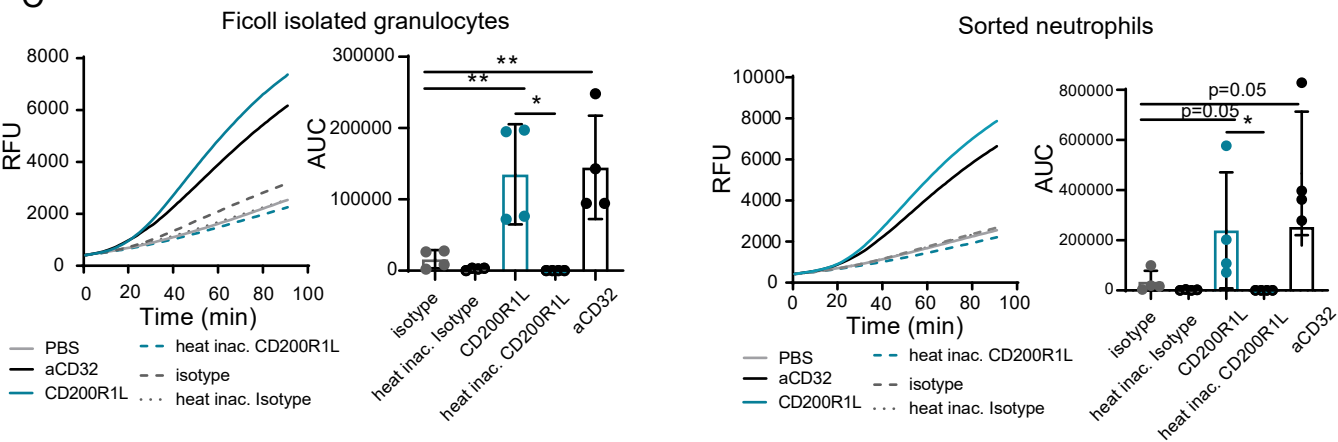

Supplement: JLB-111-367-s001.pdf [file JLB-111-367-s001.pdf]

# Supplementary Figure S3

A

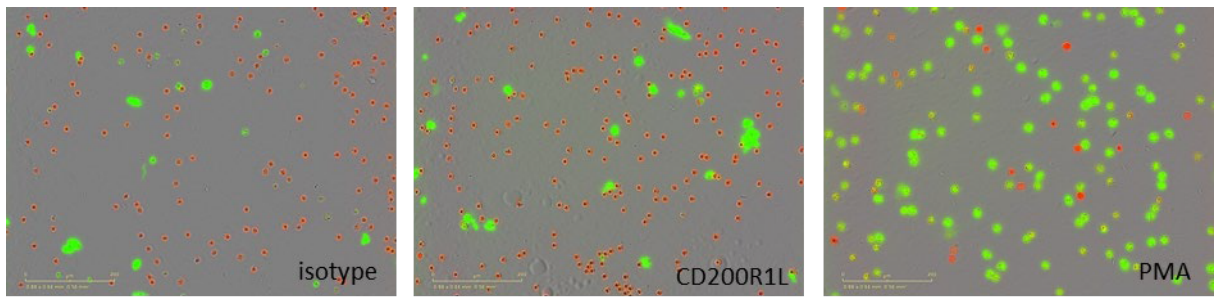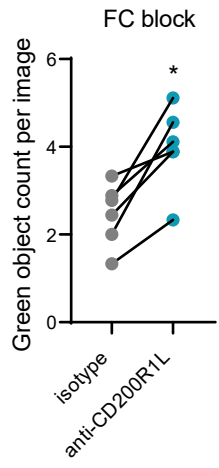

B

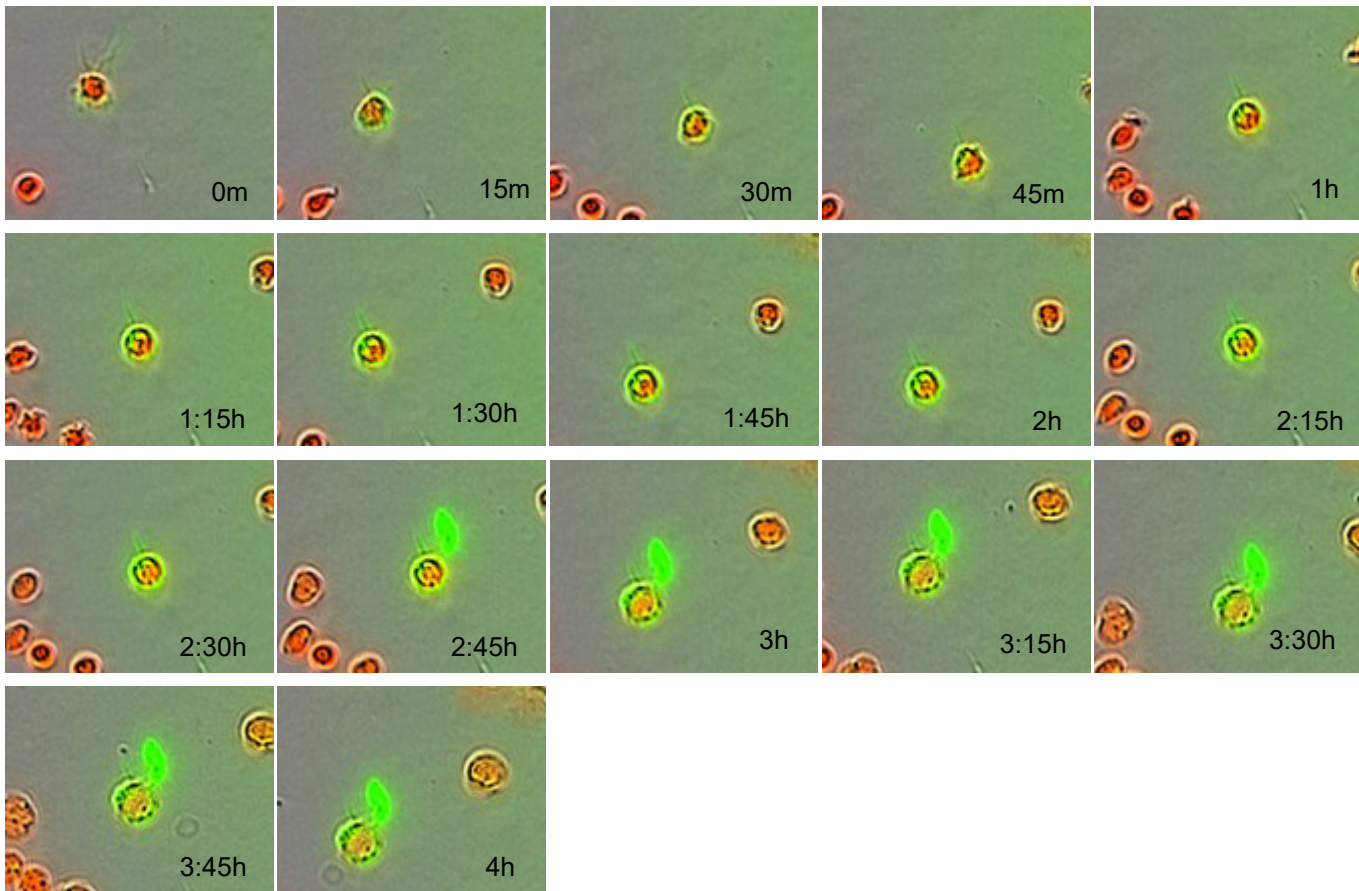

Supplement: JLB-111-367-s002.pdf [file JLB-111-367-s002.pdf]

# Supplementary Figure S1

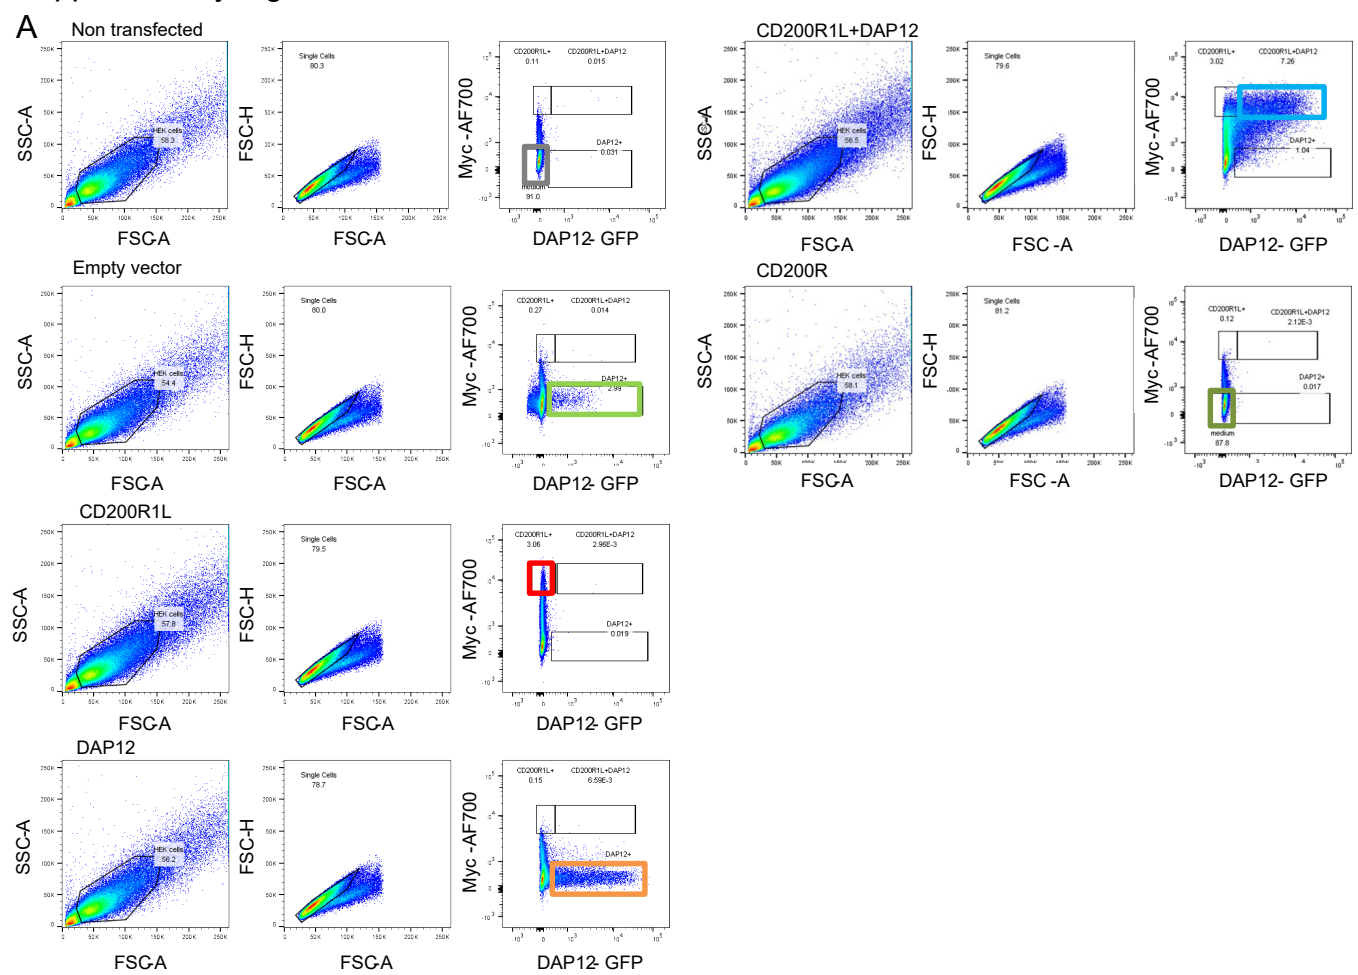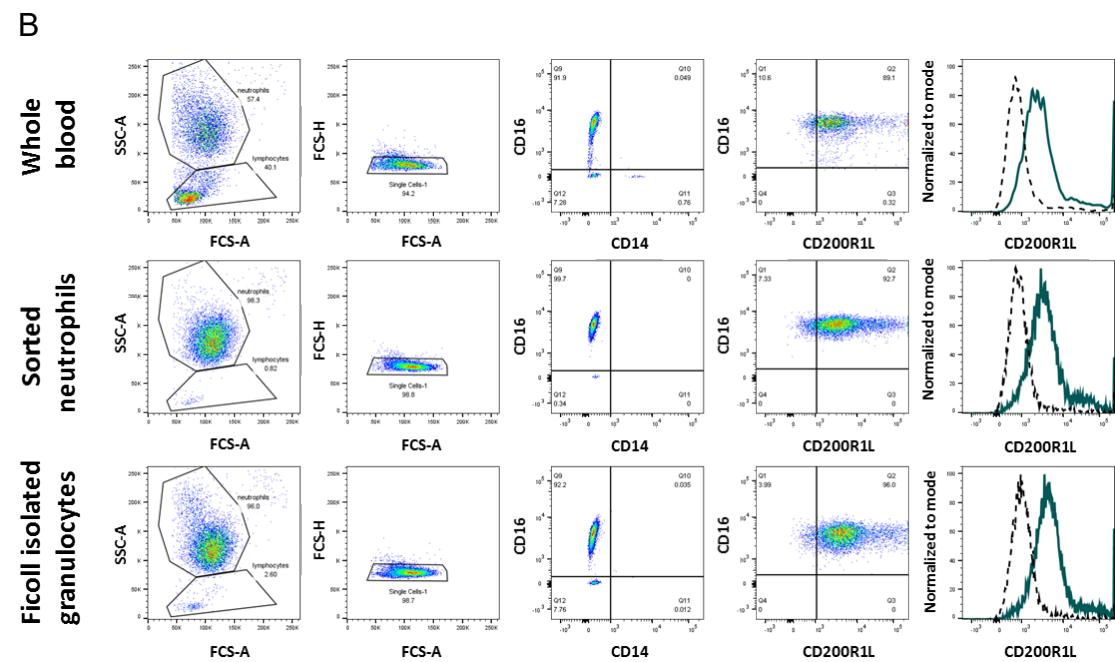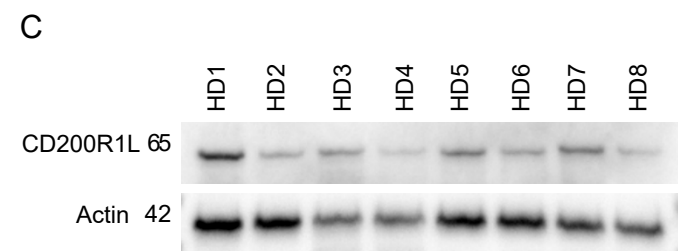

Supplement: JLB-111-367-s005.pdf [file JLB-111-367-s005.pdf]
